# Supplementary material
Source: MDPI journal article supplement (https://www.mdpi.com/2673-3501/3/3/11)
Supplement: s1 [file s1]

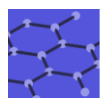

# Supplementary Materials: Catalase Like-Activity of Metal NP–Enzyme Biohybrids

Noelia Losada-Garcia, Alba Rodriguez-Otero, Clara Ortega-Nieto, Ariane Azarmi and Jose M. Palomo

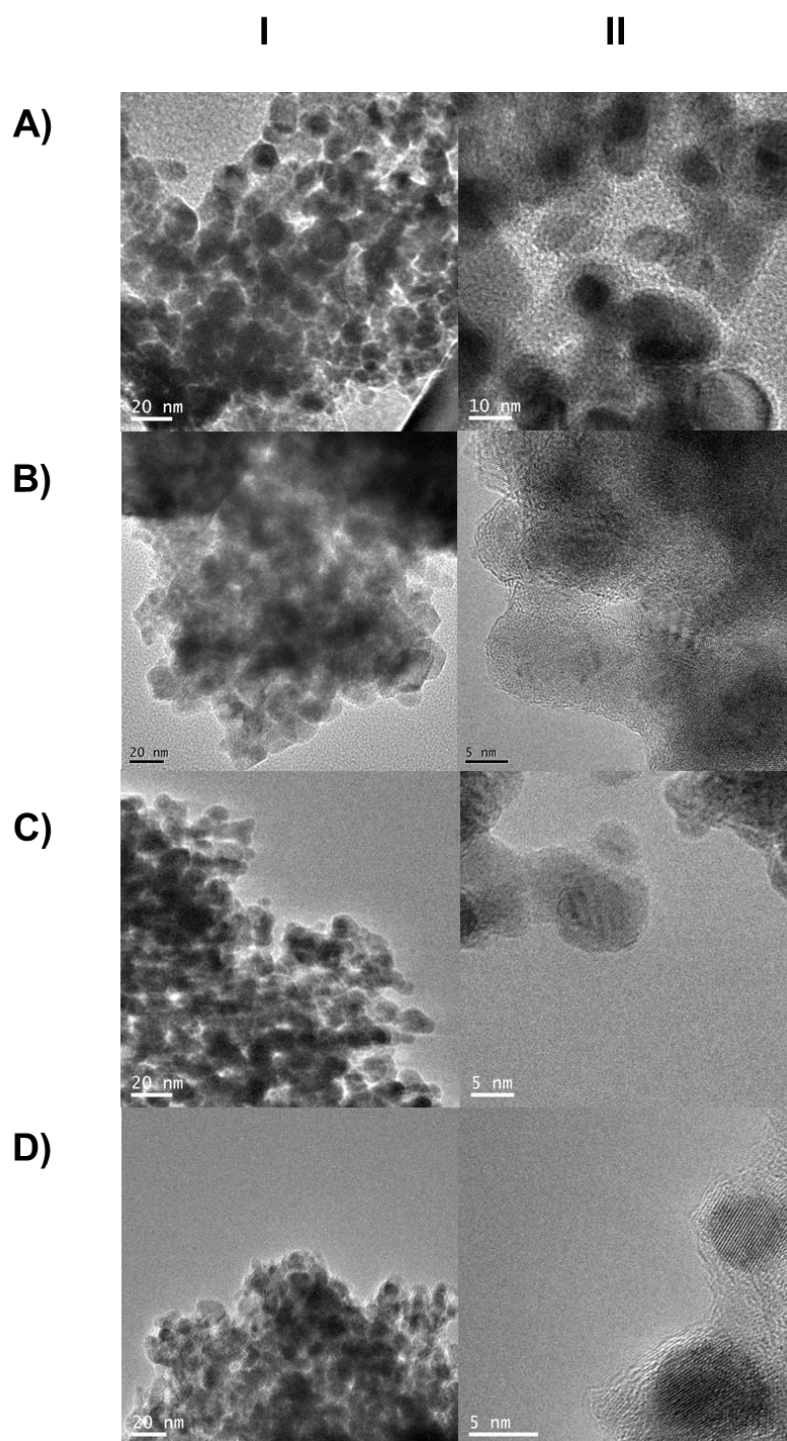

**Figure S1.** I. TEM images; II. HR-TEM images. **A)** CuNPs@CALB-P\*; **B)** CuNPs@CALB-P-NL; **C)** CuNPs@CALB-B\*; **D)** CuNPs@CALB-B.

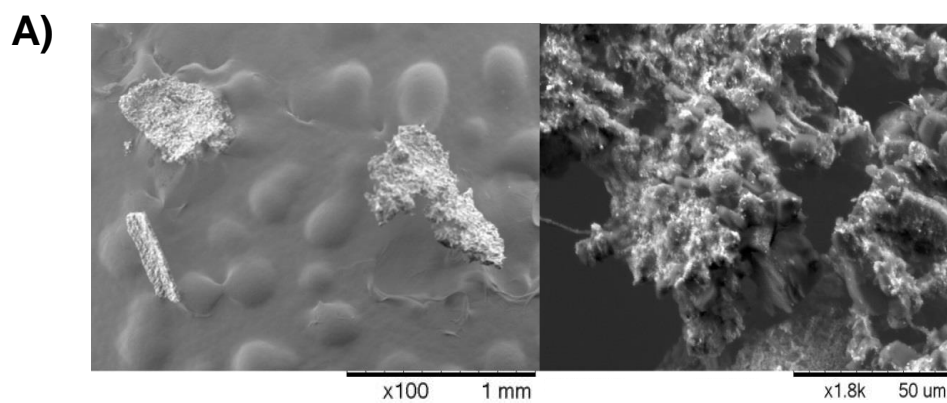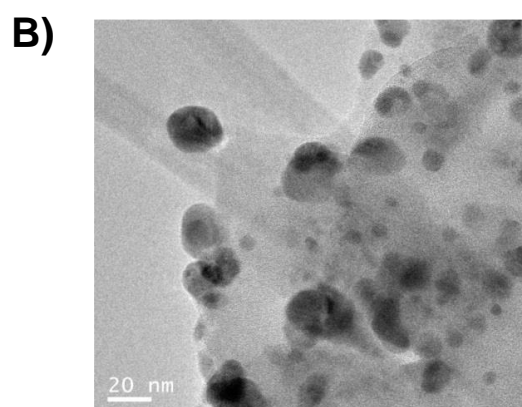

**Figure S2.** Characterization of AgNPs@CATb: **A)** SEM images; **B)** TEM image.

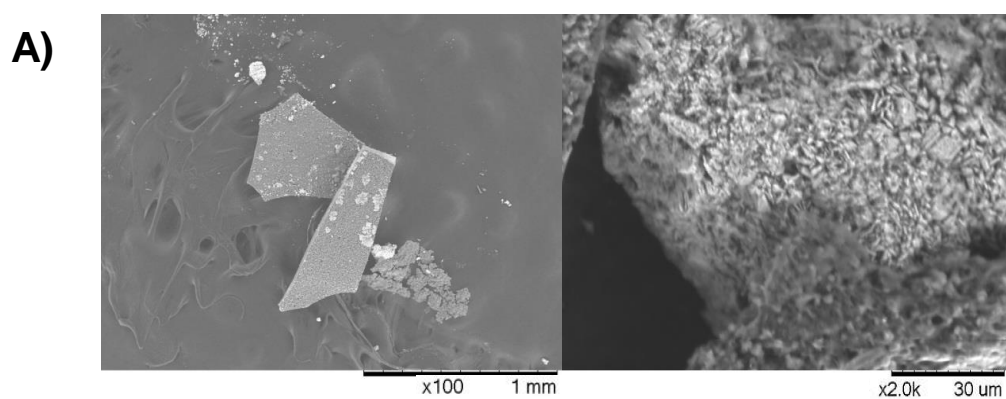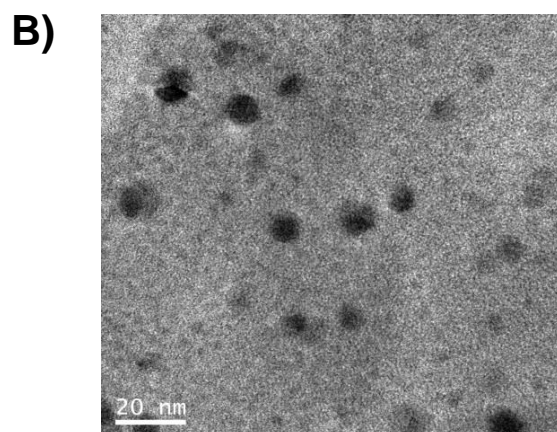

**Figure S3.** Characterization of PdNPs@CATb: **A)** SEM images; **B)** TEM image.

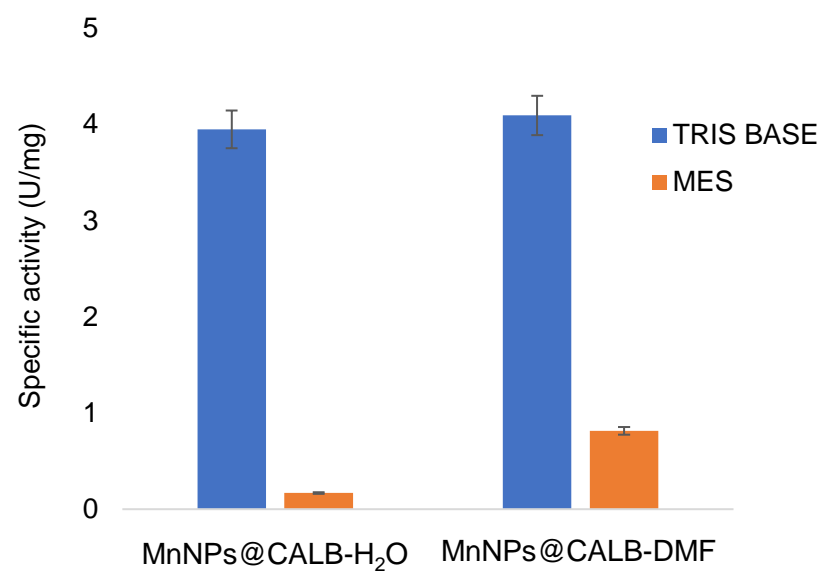

**Figure S4.** Catalase-like activity of MnNPs@CALB hybrids in 5mM of TRIS BASE pH 9 (Blue) and 5mM of MES pH 5 (Orange).

**Table S1.** Synthesis and characterization of MeNPs@Enzyme hybrids.

| <i>MeNPs hybrid</i>              | <i>Amount of enzyme<br/>(mg/mL)</i> | <i>Salt metal</i>                    | <i>Method</i>                               | <i>Amount of Me<br/>(w/w %) <sup>a</sup></i> | <i>Average NPs size<br/>(nm) <sup>b</sup></i> |
|----------------------------------|-------------------------------------|--------------------------------------|---------------------------------------------|----------------------------------------------|-----------------------------------------------|
| <b>CuNPs@CALB-P</b>              | 0.6                                 | CuSO <sub>4</sub> ·5H <sub>2</sub> O | Buffer Phosphate pH7 – NaBH <sub>4</sub>    | 60                                           | 10                                            |
| <b>CuNPs@CALB-P-NL</b>           | 0.6                                 | CuSO <sub>4</sub> ·5H <sub>2</sub> O | Buffer Phosphate pH7 – NaBH <sub>4</sub>    | 45.3                                         | 10                                            |
| <b>CuNPs@CALB-B</b>              | 0.6                                 | CuSO <sub>4</sub> ·5H <sub>2</sub> O | Buffer Bicarbonate pH10 – NaBH <sub>4</sub> | 93                                           | 6                                             |
| <b>CuNPs@CALB-P*</b>             | 0.3                                 | CuSO <sub>4</sub> ·5H <sub>2</sub> O | Buffer Phosphate pH7 – NaBH <sub>4</sub>    | 81                                           | 15                                            |
| <b>CuNPs@CALB-B*</b>             | 0.3                                 | CuSO <sub>4</sub> ·5H <sub>2</sub> O | Buffer Bicarbonate pH10 – NaBH <sub>4</sub> | 84                                           | 9                                             |
| <b>MnNPs@CALB-P</b>              | 0.3                                 | MnSO <sub>4</sub>                    | Buffer Phosphate pH7– NaBH <sub>4</sub>     | 30                                           | Nd                                            |
| <b>MnNPs@CALB-P-NR</b>           | 0.3                                 | MnSO <sub>4</sub>                    | Buffer Phosphate pH7                        | 30                                           | Nd                                            |
| <b>MnNPs@CALB-H<sub>2</sub>O</b> | 0.4                                 | KMnO <sub>4</sub>                    | Distilled water                             | 25                                           | Nd                                            |
| <b>MnNPs@CALB-DMF</b>            | 0.4                                 | KMnO <sub>4</sub>                    | DMF:Water 80:20                             | 25                                           | Nd                                            |
| <b>PdNPs@CATb</b>                | 1.5                                 | Na <sub>2</sub> PdCl <sub>4</sub>    | Distilled water                             | 27                                           | 12                                            |
| <b>AgNPs@CATb</b>                | 1.5                                 | AgNO <sub>3</sub>                    | Distilled water                             | 34                                           | 9                                             |

<sup>a</sup> The measurement was performed of the solid material. 1 mg of the solid powder was treated with 5 mL of HCl (37% v/v) for digestion. Then, it was added with 5 mL of water, centrifuged and the clear solution analyzed by Me content. <sup>b</sup> Nd: not determined.
